# Supplementary material for: Isolation of Yeast Strains with Higher Proline Uptake and Their Applications to Beer Fermentation
Source: MDPI journal article supplement (doi:10.3390/jof9121137), 2023-11-24
Supplement: s1 [file s1]

## Supplemental Files

### Isolation of yeast strains with higher proline uptake and their applications to beer fermentation

Ryoya Tanahashi <sup>1,2</sup>, Akira Nishimura <sup>1,3\*</sup>, Minh Nguyen <sup>2</sup>, Irnayuli Sitepu <sup>2</sup>, Glen Fox <sup>2</sup>,  
Kyria Boundy-Mills <sup>2</sup> and Hiroshi Takagi <sup>1\*\*</sup>

<sup>1</sup>*Institute for Research Initiatives, Nara Institute of Science and Technology, 8916-5 Takayama-cho, Ikoma, Nara 630-0192, Japan*

<sup>2</sup>*Department of Food Science and Technology, University of California Davis, One Shields Ave, Davis, CA, 95616, USA*

<sup>3</sup>*Division of Biological Science, Graduate School of Science and Technology, Nara Institute of Science and Technology, 8916-5 Takayama-cho, Ikoma, Nara 630-0192, Japan*

\*Correspondence: nishimura@bs.naist.jp

\*\*Correspondence: hiro@bs.naist.jp

**Key words:** *Saccharomyces cerevisiae*; non-*Saccharomyces*; proline utilization; yeast culture collection; beer fermentation

**This PDF file includes:**  
Fig. S1, Tables S1-S3

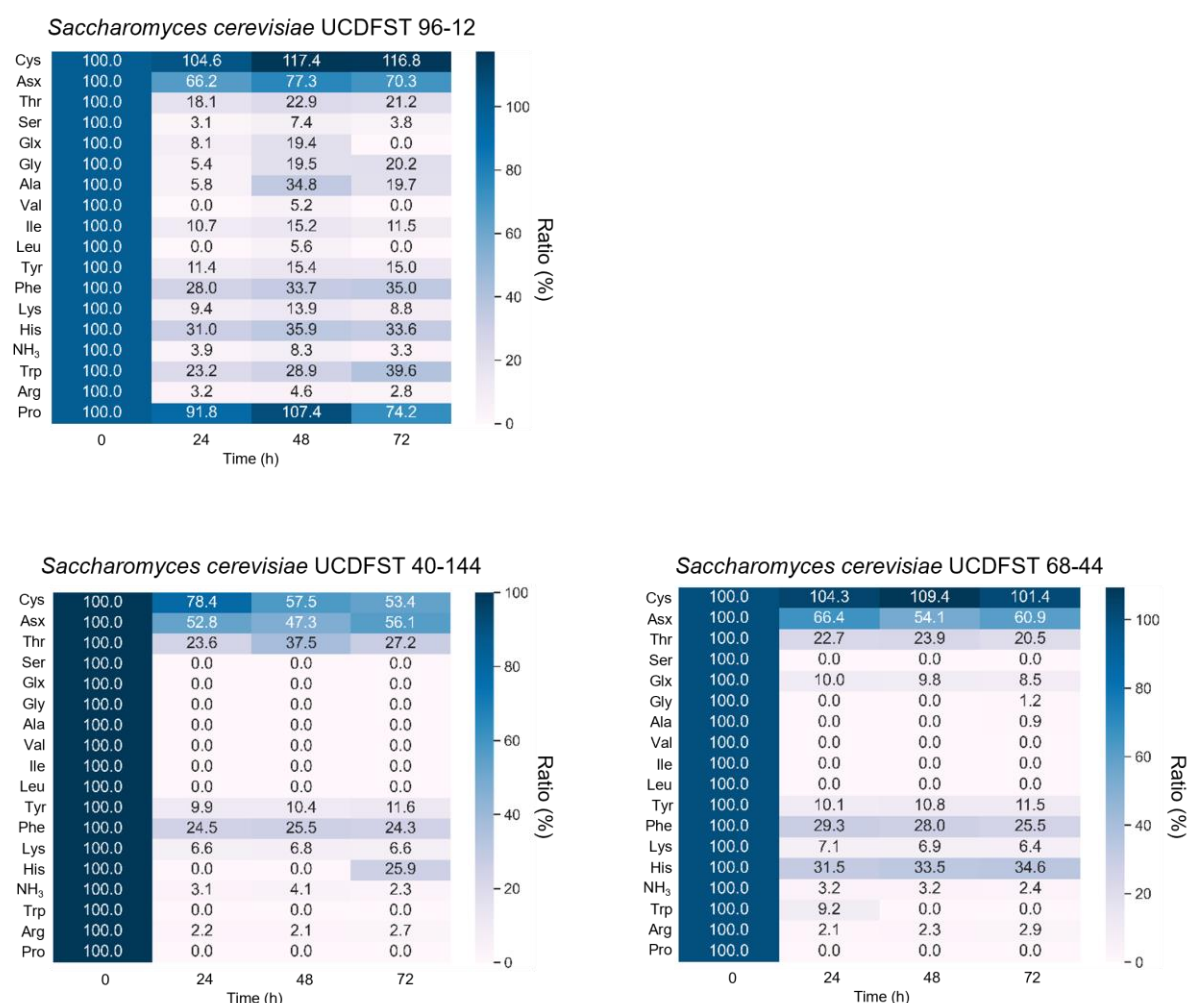

**Fig. S1. Consumption profile of all amino acids.** *S. cerevisiae* UCDFST 96-12, 40-144, or 68-44 were inoculated into 10 °P wort starting with an OD<sub>600</sub> of 0.1 per °P. The residual amino acids content was determined at 72 h by the amino acid analyzer. Data are presented as means (n = 3). Asx; Asp and Asn, Glx; Glu and Gln.

Table S1. List of strains used in this research

| Name                                                          | Geographic origin                                             | Isolate from                                                                                                                                                   | Relation: Beer or Wine |
|---------------------------------------------------------------|---------------------------------------------------------------|----------------------------------------------------------------------------------------------------------------------------------------------------------------|------------------------|
| <i>Saccharomyces cerevisiae</i> UCDFST 96-12                  |                                                               | American ale yeast                                                                                                                                             | Beer (Control)         |
| <i>Lachancea thermotolerans</i> UCDFST 04-833                 | Wolfskill Experimental Orchard, near Winters, California, USA | Bactrocoera oleae (olive fruit fly) adult male                                                                                                                 | n/a (Control)          |
| <i>Milleriomyces farinosus</i> UCDFST 75-61                   | Poland                                                        | Japan beer                                                                                                                                                     | Beer                   |
| <i>Metchnikowia zukaensis</i> UCDFST 92-68                    | Hweishi Forest, Taiwan                                        | Flowers of <i>Aleurites montana</i>                                                                                                                            | Beer                   |
| <i>Metchnikowia zukaensis</i> UCDFST 92-72                    | Hweishi Forest, Taiwan                                        | Flowers of <i>Aleurites montana</i>                                                                                                                            | Beer                   |
| <i>Saccharomyces cerevisiae</i> UCDFST 76-171                 | San Francisco, California, USA                                | Isolated from ale starter 12/76, Anchor Steam Beer.                                                                                                            | Beer                   |
| <i>Rhodotorula glutinis</i> UCDFST 92-74                      | Hweishi Forest, Taiwan                                        | Flowers of <i>Aleurites montana</i>                                                                                                                            | Beer                   |
| <i>Metchnikowia aff. laurientis</i> UCDFST 92-75              | Hweishi Forest, Taiwan                                        | Mainly flowers. Tree exudate of <i>Aleurites montana</i>                                                                                                       | Beer                   |
| <i>Wickerhamomyces anomalus</i> UCDFST 96-160                 | Davis, California, USA                                        | Bottled beer                                                                                                                                                   | Beer                   |
| <i>Pichia occidentalis</i> UCDFST 09-1244                     | Java, Indonesia                                               | Tea-beer fungus                                                                                                                                                | Beer                   |
| <i>Wickerhamiella narvagensis</i> UCDFST 65-14                | San Francisco, California, USA                                | Isolated from keg beer, Lucky Lager Co. San Francisco.                                                                                                         | Beer                   |
| <i>Saccharomyces cerevisiae</i> UCDFST 85-29                  | Seattle, Washington, USA                                      | Ale yeast                                                                                                                                                      | Beer                   |
| <i>Metchnikowia aff. zukaensis</i> UCDFST 92-76               | Hweishi Forest, Taiwan                                        | Usual in flowers. Tree exudate of <i>Aleurites montana</i>                                                                                                     | Beer                   |
| <i>Wickerhamiella spandovensis</i> UCDFST 80-34               | Germany                                                       | German Pilsener beer via Windisch                                                                                                                              | Beer                   |
| <i>Milleriomyces farinosus</i> UCDFST 08-210                  | Danzig, Poland                                                | Japan beer                                                                                                                                                     | Beer                   |
| <i>Rhodotorula mucilaginosa</i> UCDFST 68-302                 | Bremen, Germany                                               | Isolated from pasteurized beer.                                                                                                                                | Beer                   |
| <i>Kazachstanella humilis</i> UCDFST 80-36                    | South Africa                                                  | Isolated from Bantu beer in South Africa.                                                                                                                      | Beer                   |
| <i>Trigonopsis variabilis</i> UCDFST 75-19                    | Germany                                                       | Isolated from beer                                                                                                                                             | Beer                   |
| <i>Nagashiiella allidis</i> UCDFST 92-88                      | Hweishi Forest, Taiwan                                        | Tree exudate of <i>Aleurites montana</i>                                                                                                                       | Beer                   |
| <i>Saccharomyces cerevisiae</i> UCDFST 40-267                 | USA                                                           | Ale yeast                                                                                                                                                      | Beer                   |
| <i>Saccharomyces cerevisiae</i> UCDFST 40-265                 | USA                                                           | Ale yeast                                                                                                                                                      | Beer                   |
| <i>Kluyveromyces marxianus</i> UCDFST 77-73                   | South Africa                                                  | Bantu beer by v.d. Walt                                                                                                                                        | Beer                   |
| <i>Saccharomyces cerevisiae</i> UCDFST 84-16                  | UK                                                            | Ale yeast                                                                                                                                                      | Beer                   |
| <i>Saccharomyces cerevisiae</i> UCDFST 76-172                 | Anchor Steam Beer, San Francisco, California, USA             | Isolated from ale starter 12/76                                                                                                                                | Beer                   |
| <i>Kluyveromyces marxianus</i> UCDFST 71-15                   | South Africa                                                  | Isolated from bantu beer in South Africa.                                                                                                                      | Beer                   |
| <i>Magnusiomyces ingens</i> UCDFST 92-89                      | Hweishi Forest, Taiwan                                        | Tree exudate of <i>Aleurites montana</i>                                                                                                                       | Beer                   |
| <i>Pichia exigua</i> UCDFST 65-13                             | San Francisco, California, USA                                | Isolated from keg beer, Lucky Lager Co. San Francisco.                                                                                                         | Beer                   |
| <i>Saccharomyces sp.</i> UCDFST 96-46                         | Unknown                                                       | Burton Ale Yeast.                                                                                                                                              | Beer                   |
| <i>Saccharomyces cerevisiae</i> UCDFST 84-13                  | UK                                                            | Ale yeast                                                                                                                                                      | Beer                   |
| <i>Saccharomyces cerevisiae</i> UCDFST 85-32                  | Hoyland, California, USA                                      | Ale yeast                                                                                                                                                      | Beer                   |
| <i>Saccharomyces uvarum</i> UCDFST 04-316                     | Japan                                                         | BR, Spoiled beer                                                                                                                                               | Beer                   |
| <i>Saccharomyces cerevisiae</i> UCDFST 85-33                  | Unknown                                                       | Wheat beer yeast, commercial strain                                                                                                                            | Beer                   |
| <i>Dekkera bruxellensis</i> UCDFST 82-24                      | Georgia, Atlanta, USA                                         | Isolated from dry ginger ale. Obtained from D. Aborn.                                                                                                          | Beer                   |
| <i>Kluyveromyces marxianus</i> UCDFST 77-75                   | South Africa                                                  | Bantu beer                                                                                                                                                     | Beer                   |
| <i>Saccharomyces cerevisiae</i> UCDFST 12-105                 | Unknown                                                       | British Ale Yeast, WLP005                                                                                                                                      | Beer                   |
| <i>Saccharomyces cerevisiae</i> UCDFST 82-16                  | Thousand Oaks, California, USA                                | Lager beer yeast obtained from Thousand Oaks Brewery.                                                                                                          | Beer                   |
| <i>Saccharomyces cerevisiae</i> UCDFST 57-5                   | England                                                       | Isolated from super-attenuated beer                                                                                                                            | Beer                   |
| <i>Saccharomyces uvarum</i> or <i>natorum</i> UCDFST 96-36    | California, USA                                               | Lager strain; isolated by B.M. Brown (1951); Whitebread strain; Burton Ale Yeast;                                                                              | Beer                   |
| <i>Saccharomyces pastorianus</i> UCDFST 96-19                 | USA                                                           | American Lager Y east                                                                                                                                          | Beer                   |
| <i>Dekkera bruxellensis</i> UCDFST 71-11                      | Unknown                                                       | Isolated from a bottle of spoiled beer.                                                                                                                        | Beer                   |
| <i>Saccharomyces cerevisiae</i> UCDFST 96-10                  | Germany                                                       | German Ale Yeast (prob. cerevisiae).                                                                                                                           | Beer                   |
| <i>Saccharomyces cerevisiae</i> UCDFST 05-111                 | Kalamazoo, Michigan USA                                       | Oberson Ale Yeast (wheat ale)                                                                                                                                  | Beer                   |
| <i>Saccharomyces cerevisiae</i> UCDFST 77-65                  | Sonoma, California, USA                                       | Ale yeast                                                                                                                                                      | Beer                   |
| <i>Dekkera bruxellensis</i> UCDFST 71-10                      | Unknown                                                       | Isolated from a bottle of spoiled beer.                                                                                                                        | Beer                   |
| <i>Pichia kluyveri</i> UCDFST 96-35                           | Unknown                                                       | *Ale Strain; isolated by B.M. Brown (1951); Whitebread strain, MUCCL 30938,*                                                                                   | Beer                   |
| <i>Dekkera bruxellensis</i> UCDFST 71-9                       | Unknown                                                       | Isolated from a keg of spoiled beer.                                                                                                                           | Beer                   |
| <i>Saccharomyces cerevisiae</i> UCDFST 40-420                 | Copenhagen, Denmark                                           | alc; brewery top yeast originally from Kenes Broyghus in Copenhagen.                                                                                           | Beer                   |
| <i>Saccharomyces bayanus</i> UCDFST 01-135                    | Italy                                                         | Isolated from turbid beer                                                                                                                                      | Beer                   |
| <i>Saccharomyces bayanus</i> UCDFST 96-37                     | England                                                       | Lager strain.                                                                                                                                                  | Beer                   |
| <i>Dekkera bruxellensis</i> UCDFST 82-23                      | South Africa                                                  | Isolated from tea-beer in South Africa by J.P. van der Walt.                                                                                                   | Beer                   |
| <i>Saccharomyces pastorianus</i> UCDFST 96-18                 | Unknown                                                       | Pilsen Lager Yeast                                                                                                                                             | Beer                   |
| <i>Saccharomyces pastorianus</i> UCDFST 96-27                 | Unknown                                                       | Bohemian Lager Yeast                                                                                                                                           | Beer                   |
| <i>Saccharomyces aff. cerevisiae</i> UCDFST 05-115            | New Belgium Trippel Ale, Ft Collins, Colorado, USA            | New Belgium Trippel Ale, Ft Collins, Colorado.                                                                                                                 | Beer                   |
| <i>Saccharomyces pastorianus</i> UCDFST 96-21                 | California, USA                                               | California Lager Yeast                                                                                                                                         | Beer                   |
| <i>Dekkera bruxellensis</i> UCDFST 71-8                       | Unknown                                                       | Isolated from a bottle of spoiled beer.                                                                                                                        | Beer                   |
| <i>Saccharomyces cerevisiae</i> UCDFST 11-543                 | Unknown                                                       | Brewing yeast, lager type, Augustiner Type                                                                                                                     | Beer                   |
| <i>Saccharomyces cerevisiae</i> UCDFST 02-101                 | Ukiah, California, USA                                        | Blue Heron Pale ale, sediment at bottom of bottle                                                                                                              | Beer                   |
| <i>Saccharomyces cerevisiae</i> UCDFST 96-16                  | Scotland                                                      | Scottish Ale Yeast                                                                                                                                             | Beer                   |
| <i>Saccharomyces cerevisiae</i> UCDFST 96-20                  | Denmark                                                       | Danish Lager Yeast                                                                                                                                             | Beer                   |
| <i>Saccharomyces cerevisiae var. diastasicus</i> UCDFST 96-15 | Europe                                                        | European Ale Yeast.                                                                                                                                            | Beer                   |
| <i>Saccharomyces cerevisiae</i> UCDFST 96-159                 | Stockton, California, USA                                     | Barkley wine beer                                                                                                                                              | Beer                   |
| <i>Saccharomyces cerevisiae</i> UCDFST 71-141                 | Unknown                                                       | Isolated from Guinness Stout beer in Ireland; via Dr. Ballou at UCB 10/71.(different isolate from 71-140)                                                      | Beer                   |
| <i>Saccharomyces cerevisiae</i> UCDFST 85-27                  | Victoria, British Columbia, Canada                            | Ale yeast                                                                                                                                                      | Beer                   |
| <i>Saccharomyces cerevisiae</i> UCDFST 82-605                 | Unknown                                                       | Teguino ("beer" made from corn)                                                                                                                                | Beer                   |
| <i>Saccharomyces cerevisiae</i> UCDFST 08-238                 | Saint Louis, Missouri, USA                                    | Ale yeast strain 1044, primarily used for ales at Anheuser Busch. Strain also called "Bad American Ale".                                                       | Beer                   |
| <i>Saccharomyces cerevisiae</i> UCDFST 85-28                  | Victoria, British Columbia, Canada                            | Ale yeast                                                                                                                                                      | Beer                   |
| <i>Saccharomyces sp.</i> UCDFST 96-45                         | Unknown                                                       | Anchor Ale Yeast.                                                                                                                                              | Beer                   |
| <i>Saccharomyces cerevisiae</i> UCDFST 40-268                 | USA                                                           | Ale yeast                                                                                                                                                      | Beer                   |
| <i>Saccharomyces cerevisiae</i> UCDFST 96-156                 | Stockton, California, USA                                     | Red beer yeast slurry                                                                                                                                          | Beer                   |
| <i>Saccharomyces cerevisiae</i> UCDFST 82-152                 | Unknown                                                       | Lager beer yeast obtained from Maynard Diamond.                                                                                                                | Beer                   |
| <i>Saccharomyces cerevisiae</i> UCDFST 96-34                  | Belgium                                                       | Belgian White Beer Yeast.                                                                                                                                      | Beer                   |
| <i>Saccharomyces cerevisiae</i> UCDFST 96-13                  | Ireland                                                       | Irish Ale Yeast                                                                                                                                                | Beer                   |
| <i>Saccharomyces cerevisiae</i> UCDFST 15-388                 | Missouri, USA                                                 | Isolated from beer                                                                                                                                             | Beer                   |
| <i>Saccharomyces cerevisiae</i> UCDFST 40-264                 | USA                                                           | Ale yeast                                                                                                                                                      | Beer                   |
| <i>Saccharomyces pastorianus</i> UCDFST 04-321                | Copenhagen, Denmark                                           | Beer, Brewer's yeast                                                                                                                                           | Beer                   |
| <i>Saccharomyces cerevisiae</i> UCDFST 96-11                  | London, England                                               | London Ale Yeast                                                                                                                                               | Beer                   |
| <i>Saccharomyces cerevisiae</i> UCDFST 57-47                  | Azusa, California, USA                                        | Lucky Lager brewing strain                                                                                                                                     | Beer                   |
| <i>Saccharomyces cerevisiae</i> UCDFST 94-52                  | Unknown                                                       | Lager yeast                                                                                                                                                    | Beer                   |
| <i>Saccharomyces cerevisiae</i> UCDFST 69-52                  | Norfolk, UK                                                   | brewing yeast, ale. Used commercially in APV tower fermenters.                                                                                                 | Beer                   |
| <i>Saccharomyces cerevisiae</i> UCDFST 85-30                  | Portland, Oregon, USA                                         | Ale yeast                                                                                                                                                      | Beer                   |
| <i>Hanseniaspora uvarum</i> UCDFST 68-28                      | Hungary                                                       | From beer (H. de Graaf)                                                                                                                                        | Beer                   |
| <i>Saccharomyces cerevisiae</i> UCDFST 82-152 S8              | Unknown                                                       | Lager beer yeast obtained from Maynard Diamond.                                                                                                                | Beer                   |
| <i>Saccharomyces sp.</i> UCDFST 96-44                         | Unknown                                                       | Anchor Lager Yeast                                                                                                                                             | Beer                   |
| <i>Saccharomyces cerevisiae</i> UCDFST 96-14                  | England                                                       | British Ale Yeast.                                                                                                                                             | Beer                   |
| <i>Saccharomyces pastorianus</i> UCDFST 96-25                 | Unknown                                                       | Munich Lager Yeast.                                                                                                                                            | Beer                   |
| <i>Saccharomyces cerevisiae</i> UCDFST 96-17                  | London, England                                               | Special London Ale Yeast.                                                                                                                                      | Beer                   |
| <i>Brettanomyces bruxellensis</i> UCDFST 04-212               | Brussels, Belgium                                             | Lambic beer                                                                                                                                                    | Beer                   |
| <i>Saccharomyces cerevisiae</i> UCDFST 15-380                 | West Africa                                                   | Isolated from beer                                                                                                                                             | Beer                   |
| <i>Candida pinii</i> UCDFST 51-27                             | Sweden                                                        | Isolated from heartwood of live pines ; by Lagerberg                                                                                                           | Beer                   |
| <i>Saccharomyces pastorianus</i> UCDFST 96-23                 | Unknown                                                       | Bavarian Lager Yeast                                                                                                                                           | Beer                   |
| <i>Saccharomyces sp.</i> UCDFST 96-38                         | Unknown                                                       | Ale Strain.                                                                                                                                                    | Beer                   |
| <i>Saccharomyces</i> UCDFST 96-47                             | Unknown                                                       | St Stan's Ale Yeast.                                                                                                                                           | Beer                   |
| <i>Dekkera bruxellensis</i> UCDFST 71-12                      | Unknown                                                       | Isolated from a bottle of spoiled beer                                                                                                                         | Beer                   |
| <i>Candida sake</i> UCDFST 67-43                              | Belgium                                                       | Isolated by H. Kufferath from lambic beer, Belgium.                                                                                                            | Beer                   |
| <i>Saccharomyces cerevisiae</i> UCDFST 82-152 Matte           | Unknown                                                       | Lager beer yeast obtained from Maynard Diamond.                                                                                                                | Beer                   |
| <i>Torulaspora delbrueckii</i> UCDFST 69-34                   | Unknown                                                       | From spoiled ale.                                                                                                                                              | Beer                   |
| <i>Wickerhamiella nanus</i> UCDFST 80-82                      | Germany                                                       | Isolated from German Pilsener beer by W. Henniger                                                                                                              | Beer                   |
| <i>Candida meyeriana</i> UCDFST 59-22                         | Lucky Lager Brewery, San Francisco, California, USA           | Isolated from fermenting beer wort                                                                                                                             | Beer                   |
| <i>Candida meyeriana</i> UCDFST 67-37                         | Holland                                                       | Isolated from beer conduit tubes. Holland, by R. Vermeulen.                                                                                                    | Beer                   |
| <i>Magnusiomyces ingens</i> UCDFST 92-90                      | Hweishi Forest, Taiwan                                        | Tree exudate of <i>Aleurites montana</i>                                                                                                                       | Beer                   |
| <i>Saccharomyces cerevisiae</i> UCDFST 85-31                  | Portland, Oregon, USA                                         | Ale yeast                                                                                                                                                      | Beer                   |
| <i>Saccharomyces cerevisiae</i> UCDFST 57-48                  | Azusa, California, USA                                        | Lucky Lager brewing strain                                                                                                                                     | Beer                   |
| <i>Diatina catenulata</i> UCDFST 59-20                        | Lucky Lager Brewery, San Francisco, California, USA           | Isolated from fermenting beer wort                                                                                                                             | Beer                   |
| <i>Candida meyeriana</i> UCDFST 09-1245                       | Germany                                                       | Beer pipes in brewery                                                                                                                                          | Beer                   |
| <i>Brettanomyces nanus</i> UCDFST 13-104                      | Kalmars, Sweden                                               | Bottled beer                                                                                                                                                   | Beer                   |
| <i>Saccharomyces sp.</i> UCDFST 08-239                        | Saint Louis, Missouri, USA                                    | Strain W205, a hefeweizen strain. "W" may stand for "Wenhenstephan", at the University of Munich, brewing program. Used at Anheuser Busch to make wheat beers. | Beer                   |
| <i>Candida meyeriana</i> UCDFST 67-35                         | Germany                                                       | Isolated from beer conduit tubes, Germany by H. schnepp.                                                                                                       | Beer                   |
| <i>Cystofoliasium infirmum</i> UCDFST 68-193                  | Stockholm, Sweden                                             | Isolated from a beer bottle washer.                                                                                                                            | Beer                   |
| <i>Saccharomyces cerevisiae</i> UCDFST 11-186                 | South Africa                                                  | Wine                                                                                                                                                           | Wine                   |
| <i>Kluyveromyces fragilis var. fragilis</i> UCDFST 40-148     | Frei Bros. winery, California, USA                            | Naturally fermenting vat of wine                                                                                                                               | Wine                   |
| <i>Saccharomyces cerevisiae</i> UCDFST 70-4                   | South Africa                                                  | Isolated in South Africa from winery equipment by v.d. Walt.                                                                                                   | Wine                   |
| <i>Saccharomyces cerevisiae</i> UCDFST 40-144                 | Unknown                                                       | Wine                                                                                                                                                           | Wine                   |
| <i>Saccharomyces cerevisiae</i> UCDFST 40-262                 | State of San Paulo, Brazil                                    | Rosati Wine                                                                                                                                                    | Wine                   |
| <i>Saccharomyces cerevisiae</i> UCDFST 15-359                 | South Africa                                                  | Isolated from wine                                                                                                                                             | Wine                   |
| <i>Metchnikowia pulcherrima</i> UCDFST 04-201                 | Unknown                                                       | Isolated from barrel fermentation (wine?)                                                                                                                      | Wine                   |
| <i>Saccharomyces cerevisiae</i> UCDFST 40-74                  | California, USA                                               | Wine                                                                                                                                                           | Wine                   |
| <i>Saccharomyces cerevisiae</i> UCDFST 40-172                 | Unknown                                                       | Sherry wine strain.                                                                                                                                            | Wine                   |
| <i>Saccharomyces cerevisiae</i> UCDFST 68-44                  | France                                                        | Montrachet, Enjolras strain.                                                                                                                                   | Wine                   |
| <i>Pastionella laurentii</i> UCDFST 68-201                    | Belgian Congo                                                 | Isolated from "malfoir" (palm wine).                                                                                                                           | Wine                   |
| <i>Metchnikowia chrysoperlae</i> UCDFST 04-203                | USA, California, Napa                                         | Isolated from barrel fermentation (wine?)                                                                                                                      | Wine                   |
| <i>Pastionella laurentii</i> UCDFST 09-1247                   | Congo                                                         | Palm wine                                                                                                                                                      | Wine                   |
| <i>Candida mellissae</i> UCDFST 80-25                         | Japan                                                         | Isolated from wine in Japan by Goto.                                                                                                                           | Wine                   |
| <i>Saccharomyces cerevisiae</i> UCDFST 40-51                  | France                                                        | Burgundy wine yeast                                                                                                                                            | Wine                   |
| <i>Saccharomyces cerevisiae</i> UCDFST 15-367                 | Japan                                                         | Isolated from wine                                                                                                                                             | Wine                   |
| <i>Saccharomyces cerevisiae</i> UCDFST 15-386                 | Africa                                                        | Isolated from wine                                                                                                                                             | Wine                   |
| <i>Saccharomyces cerevisiae</i> UCDFST 86-9                   | Probably Germany                                              | Giesenheim wine strain                                                                                                                                         | Wine                   |
| <i>Saccharomyces cerevisiae</i> UCDFST 15-374                 | France                                                        | Isolated from wine                                                                                                                                             | Wine                   |
| <i>Saccharomyces cerevisiae</i> UCDFST 40-175                 | Unknown                                                       | Zinfandel wine strains.                                                                                                                                        | Wine                   |
| <i>Saccharomyces cerevisiae</i> UCDFST 04-317                 | Switzerland                                                   | Wine                                                                                                                                                           | Wine                   |
| <i>Saccharomyces cerevisiae</i> UCDFST 11-505                 | France                                                        | Wine                                                                                                                                                           | Wine                   |
| <i>Saccharomyces cerevisiae</i> UCDFST 15-393                 | Unknown                                                       | Isolated from wine                                                                                                                                             | Wine                   |
| <i>Saccharomyces cerevisiae</i> UCDFST 15-357                 | Italy                                                         | Isolated from wine                                                                                                                                             | Wine                   |
| <i>Saccharomyces cerevisiae</i> UCDFST 11-195                 | Japan                                                         | Wine                                                                                                                                                           | Wine                   |
| <i>Saccharomyces cerevisiae</i> UCDFST 61-22                  | Ivory Coast, South Africa                                     | Isolated from palm wine Type strain of <i>Saccharomyces chevalieri</i> .                                                                                       | Wine                   |
| <i>Saccharomyces cerevisiae</i> UCDFST 01-102                 | Unknown                                                       | Commercial wine strain K-1, UCD VE # 960. Obtained by VE from Scott Lals, Lalvin, 1993.                                                                        | Wine                   |
| <i>Saccharomyces cerevisiae</i> UCDFST 15-302                 | Nigeria                                                       | Isolated from                                                                                                                                                  | Wine                   |
| <i>Saccharomyces cerevisiae</i> UCDFST 79-296                 | Unknown                                                       | Wine yeast "Assmanns haussen" obtained from wine consultant I. Wara                                                                                            | Wine                   |
| <i>Saccharomyces cerevisiae</i> UCDFST 74-42                  | USA, California                                               | Isolated in Pfaff's lab from a sample of Chateau Blanc wine from Chappellet Vineyards as a majority isolates. 6-74.                                            | Wine                   |
| <i>Pichia membrifaciens</i> UCDFST 78-73                      | Unknown                                                       | Isolated by Paulette from bottled wine                                                                                                                         | Wine                   |
| <i>Saccharomyces cerevisiae</i> UCDFST 40-168                 | Unknown, possibly Spain                                       | Wine                                                                                                                                                           | Wine                   |
| <i>Saccharomyces cerevisiae</i> UCDFST 40-180                 | Unknown                                                       | Riesling Wine strain                                                                                                                                           | Wine                   |
| <i>Saccharomyces cerevisiae</i> UCDFST 01-109                 | Nigeria                                                       | Commercial wine strain Montrachet                                                                                                                              | Wine                   |
| <i>Saccharomyces cerevisiae</i> UCDFST 15-402                 | Unknown                                                       | Isolated from wine                                                                                                                                             | Wine                   |
| <i>Pichia membrifaciens</i> UCDFST 78-74                      | Unknown                                                       | Isolated by Paulette from bottled wine                                                                                                                         | Wine                   |
| <i>Pichia membrifaciens</i> UCDFST 78-72                      | Unknown                                                       | Isolated by Paulette from bottled wine                                                                                                                         | Wine                   |
| <i>Saccharomyces cerevisiae</i> UCDFST 15-356                 | Italy                                                         | Isolated from wine                                                                                                                                             | Wine                   |
| <i>Saccharomyces cerevisiae</i> UCDFST 75-12                  | Spain                                                         | Wine strain Flor, University Food Corp.                                                                                                                        | Wine                   |
| <i>Saccharomyces cerevisiae</i> UCDFST 40-260                 | Marinac, California, USA                                      | Di Gardi Sweet wine                                                                                                                                            | Wine                   |
| <i>Saccharomyces cerevisiae</i> UCDFST 01-106                 | USA, California                                               | Commercial wine strain Premier Cuvee, Red Star, UCD VE # 905.                                                                                                  | Wine                   |
| <i>Saccharomyces bayanus</i> UCDFST 74-43                     | Unknown                                                       | Isolated in Dr. Pfaff's lab from a sample of Riesling wine from Chappellet Vineyards as the only occurring yeast. 6-74.                                        | Wine                   |
| <i>Saccharomyces cerevisiae</i> UCDFST 15-405                 | Slovenia                                                      | Isolated from wine                                                                                                                                             | Wine                   |
| <i>Saccharomyces cerevisiae</i> UCDFST 01-104                 | Unknown                                                       | Commercial wine strain 71 B, UCD VE # 959.                                                                                                                     | Wine                   |
| <i>Saccharomyces cerevisiae</i> UCDFST 01-101                 | Unknown                                                       | Commercial wine strain Souche, KCV D47, UCD VE # 963. Obtained by VE from Vinquay, Enfermer, 1993.                                                             | Wine                   |
| <i>Saccharomyces cerevisiae</i> UCDFST 79-297                 | Unknown                                                       | Wine yeast "Chamagne" obtained from wine consultant L. Wara                                                                                                    | Wine                   |
| <i>Saccharomyces cerevisiae</i> UCDFST 15-345                 | Africa                                                        | Isolated from wine                                                                                                                                             | Wine                   |
| <i>Saccharomyces cerevisiae</i> UCDFST 01-112                 | France, Bouzy                                                 | Wine strain Bouzy                                                                                                                                              | Wine                   |
| <i>Saccharomyces cerevisiae</i> UCDFST 96-153                 | Stockton, California, USA                                     | Barkley wine yeast slurry                                                                                                                                      | Wine                   |
| <i>Tetrahena delbrueckii</i> UCDFST 13-115                    | Chateau Lachey-Halde, Bordeaux, France                        | Grape wine (Merlot), 2007                                                                                                                                      | Wine                   |
| <i>Saccharomyces cerevisiae</i> UCDFST 40-213                 | Minas Gerais, Brazil                                          | Strain "Rimac" isolated from Rimac Wine                                                                                                                        | Wine                   |
| <i>Saccharomyces cerevisiae</i> UCDFST 81-292                 | Unknown                                                       | Chamagne wine                                                                                                                                                  | Wine                   |
| <i>Saccharomyces cerevisiae</i> UCDFST 79-298                 | Probably Germany                                              | Wine yeast "Trochobren anskonen"                                                                                                                               | Wine                   |
| <i>Saccharomyces cerevisiae</i> UCDFST 40-181                 | Unknown                                                       | Winnigen Wine strain                                                                                                                                           | Wine                   |
| <i>Tamulasma meycana</i> UCDFST 69-32                         | Italy                                                         | Isolated in Italy from wine must by Florenzano in 1953.                                                                                                        | Wine                   |
| <i>Saccharomyces cerevisiae</i> UCDFST 11-176                 | California, USA                                               | Wine                                                                                                                                                           | Wine                   |
| <i>Saccharomyces sp.</i> UCDFST 96-28                         | Unknown                                                       | Red Wine Yeast, Wyeast#3028                                                                                                                                    | Wine                   |
| <i>Saccharomyces cerevisiae</i> UCDFST 40-146                 | Champagne, France                                             | Wine strain Champagne Ay C.                                                                                                                                    | Wine                   |
| <i>Saccharomyces cerevisiae</i> UCDFST 40-176                 | Unknown                                                       | Waldenburg wine strain.                                                                                                                                        | Wine                   |

|                                                      |                                             |                                                                              |      |
|------------------------------------------------------|---------------------------------------------|------------------------------------------------------------------------------|------|
| <i>Schizosaccharomyces japonicus</i> UCDFST 71-26    | Japan                                       | Strawberry wine                                                              | Wine |
| <i>Saccharomyces cerevisiae</i> UCDFST 40-169        | Unknown                                     | Stenberg wine strain.                                                        | Wine |
| <i>Saccharomyces cerevisiae</i> UCDFST 01-105        | Unknown                                     | Commercial wine strain M2, UCD VE # 906.                                     | Wine |
| <i>Starmerella bacillaris</i> UCDFST 07-106          | Bordeaux, France                            | Wine fermentation                                                            | Wine |
| <i>Saccharomyces cerevisiae</i> UCDFST 01-133        | Unknown                                     | Simi white (wine?) strain                                                    | Wine |
| <i>Saccharomyces cerevisiae</i> UCDFST 40-87         | France, Sauterne                            | Sauterne wine                                                                | Wine |
| <i>Saccharomyces cerevisiae</i> UCDFST 96-155        | Stockton, California, USA                   | Barley wine yeast slurry                                                     | Wine |
| <i>Saccharomyces cerevisiae</i> UCDFST 40-167        | Unknown, possibly Germany                   | Geisenheim Wine Strain.                                                      | Wine |
| <i>Saccharomyces cerevisiae</i> UCDFST 01-132        | France                                      | Wine strain Prise de Mousse Champagne, Pasteur Institute                     | Wine |
| <i>Taralozpora dellavacchi</i> UCDFST 13-114         | Bordeaux, France                            | Grape wine (Merlot), 2007.                                                   | Wine |
| <i>Saccharomyces cerevisiae</i> UCDFST 01-100        |                                             | Commercial wine strain Cote des Blancs, UCD VE # 2031.                       | Wine |
| <i>Saccharomyces bayanus</i> UCDFST 75-43            | California, USA                             | Isolated from commercial Zinfandel wine                                      | Wine |
| <i>Saccharomyces cerevisiae</i> UCDFST 40-44         | Unknown                                     | Champagne wine yeast.                                                        | Wine |
| <i>Saccharomyces cerevisiae</i> UCDFST 11-125        | Nigeria                                     | Palm wine                                                                    | Wine |
| <i>Saccharomyces cerevisiae</i> UCDFST 11-182        | Italy                                       | Wine                                                                         | Wine |
| <i>Starmerella bacillaris</i> UCDFST 06-143          | Napa, California, USA                       | Sweet wine fermentation (Dolce), semillon grape juice                        | Wine |
| <i>Saccharomyces cerevisiae</i> UCDFST 01-103        | Italy                                       | Unknown                                                                      | Wine |
| <i>Saccharomyces bayanus</i> UCDFST 11-130           | Tinukari, North Kolaka, Sulawesi, Indonesia | Tree on trail. Scarab larva 017. Gut dissection.                             | Wine |
| <i>Saccharomyces cerevisiae</i> UCDFST 74-44         | Chappellet Vineyards, California, USA       | Isolated in Dr. Phaff's lab from Chenn Blanc wine as minority organism, 6/74 | Wine |
| <i>Saccharomyces cerevisiae</i> UCDFST 15-305        | Slovenia                                    | Isolated from wine                                                           | Wine |
| <i>Saccharomyces cerevisiae</i> UCDFST 15-307        | Europe                                      | Isolated from wine.                                                          | Wine |
| <i>Debarya brachyellensis</i> UCDFST 77-5            | Unknown                                     | Unknown                                                                      | Wine |
| <i>Saccharomyces cerevisiae</i> UCDFST 40-177        | Europe                                      | European winery, Bordeaux wine strain.                                       | Wine |
| <i>Greenevalleyomyia turritiformis</i> UCDFST 12-178 | Torres Vedras, Roma, Portugal               | Dried lees of wine                                                           | Wine |
| <i>Saccharomyces bayanus</i> UCDFST 11-129           | North Carolina, USA                         | Wine                                                                         | Wine |
| <i>Pisibaculum capituligenum</i> UCDFST 68-248       | South Africa                                | Isolated from wine cellar material v.d. Walt.                                | Wine |
| <i>Saccharomyces cerevisiae</i> UCDFST 11-183        | Italy                                       | Wine                                                                         | Wine |
| <i>Saccharomyces cerevisiae</i> UCDFST 01-108        | Unknown                                     | Commercial wine strain French White                                          | Wine |
| <i>Saccharomyces cerevisiae</i> UCDFST 15-378        | France                                      | Isolated from wine                                                           | Wine |
| <i>Saccharomyces cerevisiae</i> UCDFST 01-124        | Hungary, Tokaj region                       | Wine strain Tokaj.                                                           | Wine |
| <i>Saccharomyces cerevisiae</i> UCDFST 01-119        | Unknown                                     | Wine strain Muscatel                                                         | Wine |
| <i>Saccharomyces cerevisiae</i> UCDFST 79-45         | Spain                                       | Isolated from white wine by J. Santa Maria                                   | Wine |
| <i>Starmerella bacillaris</i> UCDFST 06-151          | Tokaj wine region, Hungary                  | Botrytized wine                                                              | Wine |
| <i>Saccharomyces cerevisiae</i> UCDFST 01-107        | Unknown                                     | Commercial wine strain Pasteur Champagne, Red Star                           | Wine |
| <i>Piscomyces carsoni</i> UCDFST 66-20               | Germany                                     | Bottle of spoiled wine                                                       | Wine |
| <i>Debaryomyces hansenii</i> UCDFST 13-117           | Bordeaux, France                            | Grape/wine                                                                   | Wine |
| <i>Saccharomyces cerevisiae</i> UCDFST 11-181        | Italy                                       | Wine                                                                         | Wine |
| <i>Saccharomyces cerevisiae</i> UCDFST 09-111        | Unknown                                     | Wine                                                                         | Wine |
| <i>Saccharomyces cerevisiae</i> UCDFST 40-178        | Unknown                                     | Muscated wine strain.                                                        | Wine |
| <i>Saccharomyces cerevisiae</i> UCDFST 06-152        | Tokaj wine region, Hungary                  | Wine                                                                         | Wine |

**Table S2.** Number and ratio of strains sorted by genera.

| Genus                      | Number | Ratio (%) |
|----------------------------|--------|-----------|
| <i>Saccharomyces</i>       | 142    | 69.3      |
| <i>Dekkera</i>             | 8      | 3.9       |
| <i>Candida</i>             | 7      | 3.4       |
| <i>Pichia</i>              | 6      | 2.9       |
| <i>Metschnikowia</i>       | 6      | 2.9       |
| <i>Kluyveromyces</i>       | 4      | 2.0       |
| <i>Wickerhamiella</i>      | 3      | 1.5       |
| <i>Torulaspora</i>         | 3      | 1.5       |
| <i>Starmerella</i>         | 3      | 1.5       |
| <i>Rhodotorula</i>         | 2      | 1.0       |
| <i>Papiliotrema</i>        | 2      | 1.0       |
| <i>Millerozyma</i>         | 2      | 1.0       |
| <i>Magnusiomyces</i>       | 2      | 1.0       |
| <i>Brettanomyces</i>       | 2      | 1.0       |
| <i>Yamadazyma</i>          | 1      | 0.5       |
| <i>Wickerhamomyces</i>     | 1      | 0.5       |
| <i>Trigonopsis</i>         | 1      | 0.5       |
| <i>Schizosaccharomyces</i> | 1      | 0.5       |
| <i>Priceomyces</i>         | 1      | 0.5       |
| <i>Piskurozyma</i>         | 1      | 0.5       |
| <i>Naganishia</i>          | 1      | 0.5       |
| <i>Kazachstania</i>        | 1      | 0.5       |
| <i>Hanseniaspora</i>       | 1      | 0.5       |
| <i>Groenewaldozyma</i>     | 1      | 0.5       |
| <i>Diutina</i>             | 1      | 0.5       |
| <i>Debaryomyces</i>        | 1      | 0.5       |
| <i>Cystofilobasidium</i>   | 1      | 0.5       |
| Total                      | 205    | 100.0     |

**Table S3.** Number of strains in selected genera before and after screenings.

| Genus                  | Number of strains |          | Ratio (%) |
|------------------------|-------------------|----------|-----------|
|                        | Subjected         | Obtained |           |
| <i>Saccharomyces</i>   | 142               | 11       | 7.7       |
| <i>Candida</i>         | 7                 | 1        | 14.3      |
| <i>Metschnikowia</i>   | 6                 | 6        | 100.0     |
| <i>Pichia</i>          | 6                 | 1        | 16.7      |
| <i>Kluyveromyces</i>   | 4                 | 2        | 50.0      |
| <i>Wickerhamiella</i>  | 3                 | 2        | 66.7      |
| <i>Millerozyma</i>     | 2                 | 2        | 100.0     |
| <i>Papiliotrema</i>    | 2                 | 2        | 100.0     |
| <i>Rhodotorula</i>     | 2                 | 2        | 100.0     |
| <i>Kazachstania</i>    | 1                 | 1        | 100.0     |
| <i>Wickerhamomyces</i> | 1                 | 1        | 100.0     |
